# Supplementary material
Source: PubMed Central journal article supplement (PMC6865330)
Supplement: jamacardiol-5-175-s001.pdf [file jamacardiol-5-175-s001.pdf]

## Supplementary Online Content

McCullough M, Caraballo C, Ravindra NG, et al. Neurohormonal blockade and clinical outcomes in patients with heart failure supported by left ventricular assist devices. *JAMA Cardiol*. Published online November 18, 2019. doi: 10.1001/jamacardio.2019.4965

**eMethods.** Description of modified Charlson Comorbidities Index used for sensitivity analysis

**eTable 1.** Characteristics of Study Population by Cohort

**eTable 2.** Balance between Covariate Distributions for Propensity-Matched Patients

**eFigure 1.** Propensity Matched Cohort Analysis

**eFigure 2.** New User Analysis

**eFigure 3.** Competing Risk Analyses

This supplementary material has been provided by the authors to give readers additional information about their work.

## **eMethods: Description of modified Charlson Comorbidities Index used for sensitivity analysis**

The Charlson Comorbidities Index (CCI) was calculated using the comorbidities listed on the pre-implant data collection forms. Each comorbidity corresponds to a point value, and the sum of the points equals the CCI score. The INTERMACS data collection forms do not include every diagnosis that comprises the original CCI score. As such, we use a modified CCI score.

All patients received a point for congestive heart failure. To identify a history of myocardial infarction, we relied on the admitting diagnosis, planned reason for implant, or whether the patient had a major myocardial infarction event during hospitalization but prior to implant. For liver disease, we considered a history of hepatitis as mild (+1) and the presence of liver dysfunction as moderate to severe (+3). Patients received 2 points for severe diabetes if the presence of diabetes mellitus with end organ damage was listed on the pre-implant form. A history of uncomplicated diabetes was not present on the pre-implant form and so was not used to calculate the modified CCI score. We gave 2 points to patients with a history of solid tumor listed on the pre-implant form. The presence of metastasis was not on the forms; as such, no patients received 6 points for the presence of metastatic disease. We gave 4 points to patients with a history of lymphoma or leukemia rather than 2 points for leukemia or 2 points for lymphoma. Connective tissue disease and hemiplegia were not tracked in the pre-implant form and so these contributions to the CCI score were ignored. All other comorbidities were counted by referencing the INTERMACS pre-implant form and assigned the appropriate CCI score.

**eTable 1: Characteristics of the study population based on medication group at 6 months**

Data are presented as mean (SD) for continuous measures and n (%) for categorical variables. ACEi/ARB = angiotensin converting enzyme or angiotensin receptor blocker; BB = beta blocker; MRA = mineralocorticoid receptor antagonist; New York Heart Association= NYHA; INTERMACS= Interagency Registry for Mechanically Assisted Circulatory Support; BUN= Blood urea nitrogen; BNP= Brain natriuretic peptide; NTproBNP = N-terminal brain natriuretic peptide; INR= International normalized ratio; ALT= Alanine aminotransferase; AST= Aspartate aminotransferase.

|                                    | ACEi/ARB + BB + MRA<br>N = 1,967 | ACEi/ARB +BB<br>N=2,741 | ACE/ARB + MRA<br>N = 541 | ACEi/ARB<br>N=1035 | BB + MRA<br>N= 1,200 | BB<br>N = 2,359 | MRA<br>N=576 | Not on NHB<br>N=1,725 | P-value |
|------------------------------------|----------------------------------|-------------------------|--------------------------|--------------------|----------------------|-----------------|--------------|-----------------------|---------|
| Age, Years                         | 52.3 (14.1)                      | 56.5 (12.6)             | 53.8 (13.4)              | 58.2 (12.5)        | 56.4 (12.4)          | 59.4 (12.2)     | 58.1 (12.5)  | 59.0 (12.5)           | <0.001  |
| Women                              | 21.5%                            | 20.9%                   | 22.2%                    | 22.9%              | 21.5%                | 18.5%           | 23.6%        | 20.6%                 | 0.045   |
| White                              | 64.7%                            | 65.9%                   | 64.7%                    | 65.7%              | 68.9%                | 67.1%           | 69.8%        | 67.8%                 | 0.1     |
| African American                   | 25.1%                            | 26.8%                   | 26.8%                    | 25.6%              | 24.0%                | 24.8%           | 21.2%        | 22.8%                 | 0.033   |
| Hispanic                           | 7.0%                             | 5.9%                    | 6.3%                     | 6.2%               | 5.8%                 | 6.2%            | 4.0%         | 6.7%                  | 0.32    |
| Body mass index, kg/m <sup>2</sup> | 29.5 (7.0)                       | 28.2 (6.4)              | 29.3(6.7)                | 28 (6.5)           | 29.6 (6.6)           | 28.3 (6.8)      | 29.1 (6.9)   | 28.2                  | <0.001  |
| Body surface area                  | 2.1 (0.3)                        | 2.0 (0.3)               | 2.1(0.3)                 | 2.1 (0.3)          | 2.1 (0.3)            | 2.0 (0.3)       | 2.1 (0.3)    | 2.0 (0.3)             | <0.001  |
| <b>Comorbid conditions</b>         |                                  |                         |                          |                    |                      |                 |              |                       |         |
| Diabetes                           | 7.8%                             | 7.3%                    | 9.6%                     | 7.1%               | 7.8%                 | 7.4%            | 9.4%         | 8.9%                  | 0.24    |
| Peripheral Vascular Disease        | 3.8%                             | 4.0%                    | 4.3%                     | 4.0%               | 4.2%                 | 4.3%            | 3.1%         | 3.8%                  | 0.93    |
| Atrial Arrhythmia                  | 16.2%                            | 13.6%                   | 16.5%                    | 12.6%              | 16.0%                | 14.5%           | 16.7%        | 14.4%                 | 0.039   |
| Ischemic Heart Disease             | 4.7%                             | 5.8%                    | 5.2%                     | 5.5%               | 7.5%                 | 6.7%            | 5.9%         | 6.7%                  | 0.027   |
| Prior Cardiac Surgery              | 26.8%                            | 31.2%                   | 27.9%                    | 30.9%              | 33.3%                | 36.2%           | 35.2%        | 35.7%                 | <0.001  |

|                                     |           |           |           |           |           |           |           |           |        |
|-------------------------------------|-----------|-----------|-----------|-----------|-----------|-----------|-----------|-----------|--------|
| Chronic Lung Disease                | 7.3%      | 6.9%      | 11.5%     | 8.2%      | 6.8%      | 17.4%     | 9.9%      | 7.4%      | 0.006  |
| Active Smoker                       | 5.3%      | 6.9%      | 3.5%      | 6.0%      | 4.6%      | 4.7%      | 3.6%      | 6.1%      | 0.001  |
| Chronic Kidney Disease              | 14.8%     | 15.3%     | 16.1%     | 15.4%     | 19.8%     | 24.0%     | 22.9%     | 21.1%     | <0.001 |
| <b>INTERMACS Profile</b>            |           |           |           |           |           |           |           |           |        |
| 1                                   | 11.9%     | 12.1%     | 13.3%     | 13.9%     | 13.4%     | 13.1%     | 15.5%     | 15.4%     | <0.001 |
| 2                                   | 34.2%     | 32.4%     | 34.3%     | 38.6%     | 37.9%     | 34.8%     | 43.9%     | 37.8%     |        |
| 3                                   | 36.6%     | 34.6%     | 34.6%     | 29.6%     | 32.4%     | 34.3%     | 28.3%     | 29.9%     |        |
| 4                                   | 13.5%     | 3.8%      | 15.0%     | 13.2%     | 13.8%     | 14%       | 11.5%     | 12.5%     |        |
| 5-7                                 | 3.8%      | 5.1%      | 2.8%      | 4.7%      | 2.5%      | 3.7%      | 0.8%      | 4%        |        |
| Modified Charlson Comorbidity Index | 2 (3)     | 3 (2)     | 3 (3)     | 3 (2)     | 3 (2)     | 3 (3)     | 3 (3)     | 3 (3)     | <0.001 |
| <b>Device Strategy</b>              |           |           |           |           |           |           |           |           |        |
| Bridge to recovery                  | 0.8%      | 0.3%      | 0.6%      | 0.3%      | 0.2%      | 0.2%      | 0.9%      | 0.3%      | 0.022  |
| Bridge to transplant                | 48.4%     | 49.5%     | 51.6%     | 48.1%     | 46.7%     | 42.3%     | 51.6%     | 42.6%     | <0.001 |
| Destination therapy                 | 39.9%     | 41.1%     | 39.4%     | 42.7%     | 43.8%     | 46.9%     | 38.4%     | 49.1%     | <0.001 |
| <b>NYHA Class</b>                   |           |           |           |           |           |           |           |           |        |
| I-II                                | 0.6%      | 1.0%      | 0.9%      | 0.9%      | 0.4%      | 0.7%      | 0.7%      | 0.6%      | 0.002  |
| III                                 | 19.5%     | 19.6%     | 18.1%     | 16.7%     | 19.3%     | 17.4%     | 12.5%     | 15.9%     |        |
| IV                                  | 73.8%     | 73.6%     | 76.7%     | 76.2%     | 74.8%     | 75.8%     | 80.7%     | 75.6%     |        |
| Unknown                             | 16.2%     | 5.9%      | 4.3%      | 6.2%      | 5.4%      | 6.1%      | 6.1%      | 7.9%      |        |
| <b>Laboratory Values</b>            |           |           |           |           |           |           |           |           |        |
| Sodium, meq/L                       | 138 (3.0) | 139 (3.0) | 137 (3)   | 138 (3)   | 138 (3)   | 139(3)    | 137 (4)   | 138 (3)   | <0.001 |
| Potassium meq/L                     | 4.3 (0.4) | 4.3 (0.4) | 4.2 (0.4) | 4.2 (0.4) | 4.2 (0.5) | 4.2 (0.5) | 4.1 (0.5) | 4.2 (0.5) | <0.001 |

|                               |             |             |             |             |             |             |             |             |        |
|-------------------------------|-------------|-------------|-------------|-------------|-------------|-------------|-------------|-------------|--------|
| Creatinine, mg/dL             | 1.18 (0.43) | 1.21 (0.52) | 1.20 (0.37) | 1.23 (0.62) | 1.3 (0.5)   | 1.49 (0.89) | 1.32 (0.52) | 1.49 (0.97) | <0.001 |
| BUN, mg/dL                    | 21 (11)     | 22 (11)     | 22 (11)     | 22 (11)     | 25 (12)     | 26 (14)     | 26 (15)     | 25 (15)     | <0.001 |
| BNP, pg/L                     | 249 (298)   | 343 (451)   | 243 (253)   | 297 (311)   | 343 (419)   | 376 (457)   | 346 (340)   | 473 (590)   | <0.001 |
| proBNP, ng/L                  | 1252 (1442) | 1991 (2801) | 1544 (1567) | 1899 (3100) | 2074 (2249) | 2853 (4897) | 3214 (5335) | 3276 (4712) | <0.001 |
| Total Bilirubin, mg/dL        | 0.8 (1.0)   | 0.8 (08)    | 0.8 (0.5)   | 0.8 (0.6)   | 0.8 (0.6)   | 0.8 (0.6)   | 0.9 (06)    | 0.8 (0.8)   | 0.13   |
| Platelets (x10 <sup>3</sup> ) | 222 (68)    | 211 (66)    | 230 (72)    | 214 (65)    | 215 (69)    | 203 (67)    | 222 (80)    | 215 (76)    | <0.001 |
| INR                           | 2.25 (0.71) | 2.19 (0.74) | 2.27 (0.69) | 2.18 (0.70) | 2.22 (0.72) | 2.19 (0.73) | 2.19 (0.77) | 2.14 (0.77) | <0.001 |
| Albumin, g/dL                 | 4.0 (0.5)   | 3.9 (0.5)   | 4.0 (0.5)   | 3.9 (0.5)   | 3.9 (0.5)   | 3.8 (0.6)   | 3.9 (0.5)   | 3.7 (0.6)   | <0.001 |
| ALT, units/L                  | 29 (20)     | 31 (43)     | 29 (27)     | 29 (22)     | 29 (28)     | 33 (130)    | 27 (17)     | 29 (24)     | 0.45   |
| AST, units/L                  | 31 (17)     | 33 (36)     | 32 (24)     | 33 (23)     | 34 (26)     | 34 (35)     | 32 (16)     | 37 (88)     | 0.061  |

**eTable 2: Balance between covariate distributions for propensity-matched patients**

Data are presented as mean (SD). BMI= Body mass index; ICD= Implantable cardiac defibrillator; INTERMACS= Interagency Registry for Mechanically Assisted Circulatory Support; BUN= Blood urea nitrogen; BILI = total bilirubin.

|                                      | <b>Covariate</b>            | <b>Mean (SD) treated</b> | <b>Mean (SD) control</b> | <b>Mean difference</b> | <b>Mean difference after matching</b> | <b>Percent balance improvement</b> |
|--------------------------------------|-----------------------------|--------------------------|--------------------------|------------------------|---------------------------------------|------------------------------------|
| <b>On NHB vs. Not on NHB</b>         | Propensity score (%)        | 86.4 (4.0)               | 85.1 (4.2)               | 1.3                    | 0.03                                  | 97.62                              |
|                                      | Age (y)                     | 56.4 (13.1)              | 59.2 (12.6)              | -2.82                  | -0.6                                  | 78.43                              |
|                                      | Female                      | 0.21 (0.41)              | 0.21 (0.41)              | -0.005                 | 0.0006                                | 86.28                              |
|                                      | BMI                         | 28.7 (6.7)               | 28.1 (6.68)              | 0.64                   | 0.14                                  | 78.04                              |
|                                      | ICD                         | 0.81 (0.39)              | 0.80 (0.40)              | 0.009                  | -0.002                                | 76.42                              |
|                                      | INTERMACS profile 1 or 2    | 0.48 (0.50)              | 0.53 (0.50)              | -0.05                  | -0.001                                | 97.75                              |
|                                      | Albumin (g/dL)              | 3.44 (0.65)              | 3.33 (0.64)              | .11                    | 0.004                                 | 96.66                              |
|                                      | Dialysis                    | 0.01 (0.10)              | 0.02 (0.13)              | -.006                  | 0.002                                 | 76.63                              |
|                                      | BUN (mg/dL)                 | 28.41 (17.11)            | 31.34 (20.39)            | -2.93                  | 0.31                                  | 89.43                              |
|                                      | BILI (total, mg/DL)         | 1.29 (1.42)              | 1.34 (1.27)              | -0.05                  | 0.06                                  | -28.14                             |
|                                      | History of cardiac surgery  | 0.32 (0.47)              | 0.35 (0.48)              | -0.04                  | 0.0001                                | 99.71                              |
|                                      | Concomitant cardiac surgery | 0.38 (0.49)              | 0.43 (0.50)              | -0.05                  | 0.02                                  | 62.23                              |
| Too sick to complete EQ5D assessment | 0.44 (0.50)                 | 0.48 (0.50)              | -0.04                    | 0.001                  | 97.45                                 |                                    |
| <b>Triple therapy vs. Not on NHB</b> | Propensity score (%)        | 59.5 (15.4)              | 48.9 (15.1)              | 10.61                  | 0.2                                   | 89.14                              |
|                                      | Age (y)                     | 52.2 (14.1)              | 59.2 (12.6)              | -7.0                   | -0.24                                 | 96.54                              |
|                                      | Female                      | 0.20 (0.40)              | 0.21 (0.41)              | -.001                  | 0.001                                 | 87.99                              |
|                                      | BMI                         | 29.5 (7.0)               | 28.1 (6.7)               | 1.44                   | 0.28                                  | 80.81                              |
|                                      | ICD                         | 0.80 (0.40)              | 0.80 (0.40)              | -.004                  | -0.002                                | 59.77                              |
|                                      | INTERMACS profile 1 or 2    | 0.46 (0.50)              | 0.53 (0.50)              | -0.07                  | -0.02                                 | 76.89                              |
|                                      | Albumin (g/dL)              | 3.51 (0.64)              | 3.33 (0.64)              | 0.18                   | 0.03                                  | 84.06                              |
|                                      | Dialysis                    | 0.01 (0.08)              | 0.02 (0.13)              | -0.01                  | 0                                     | 100.00                             |

|                                      |                  |                  |       |       |       |
|--------------------------------------|------------------|------------------|-------|-------|-------|
| BUN (mg/dL)                          | 25.54<br>(14.00) | 31.34<br>(20.39) | -5.80 | 0.79  | 86.43 |
| BILI (total, mg/DL)                  | 1.30 (1.30)      | 1.34 (1.27)      | -0.04 | 0.03  | 18.0  |
| History of cardiac surgery           | 0.27 (0.44)      | 0.35 (0.48)      | -0.09 | 0..02 | 77.78 |
| Concomitant cardiac surgery          | 0.38 (48)        | 0.43 (0.50)      | -0.05 | 0.002 | 96.79 |
| Too sick to complete EQ5D assessment | 0.43 (0.49)      | 0.48 (0.50)      | -0.05 | 0.001 | 97.88 |

**eFigure 1: Propensity-matched cohort analysis**

Unadjusted Kaplan-Meier survival curve based on exposure to the various combinations of NHB therapy at 6 months post-LVAD implant. Results are displayed out to 48 months. Number at risk is shown below.

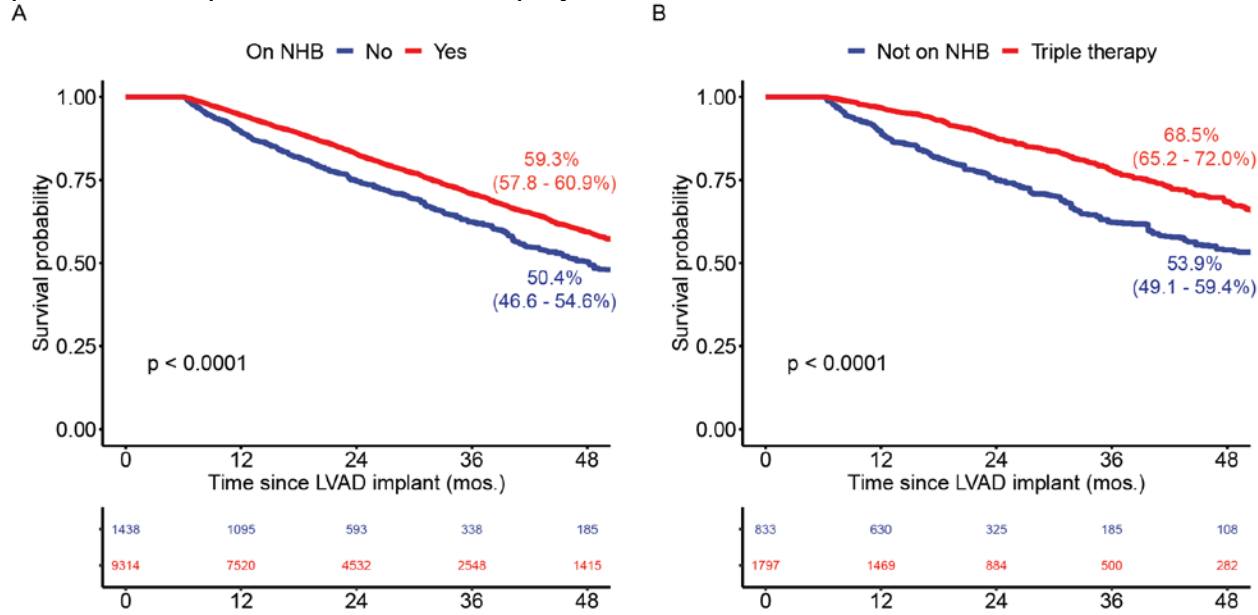



**eFigure 2. Survival Estimates Among Preimplant NHB Naïve Patients**

Effect of medical therapy on propensity-matched LVAD recipients. (A) Kaplan-Meier survival estimates weighted by covariate loading in propensity-matched analysis for patients receiving any NHB therapy vs no NHB therapy or patients receiving triple therapy vs no NHB therapy (B). Annotations show survival estimates and 95% CI at 48 months post-implant.

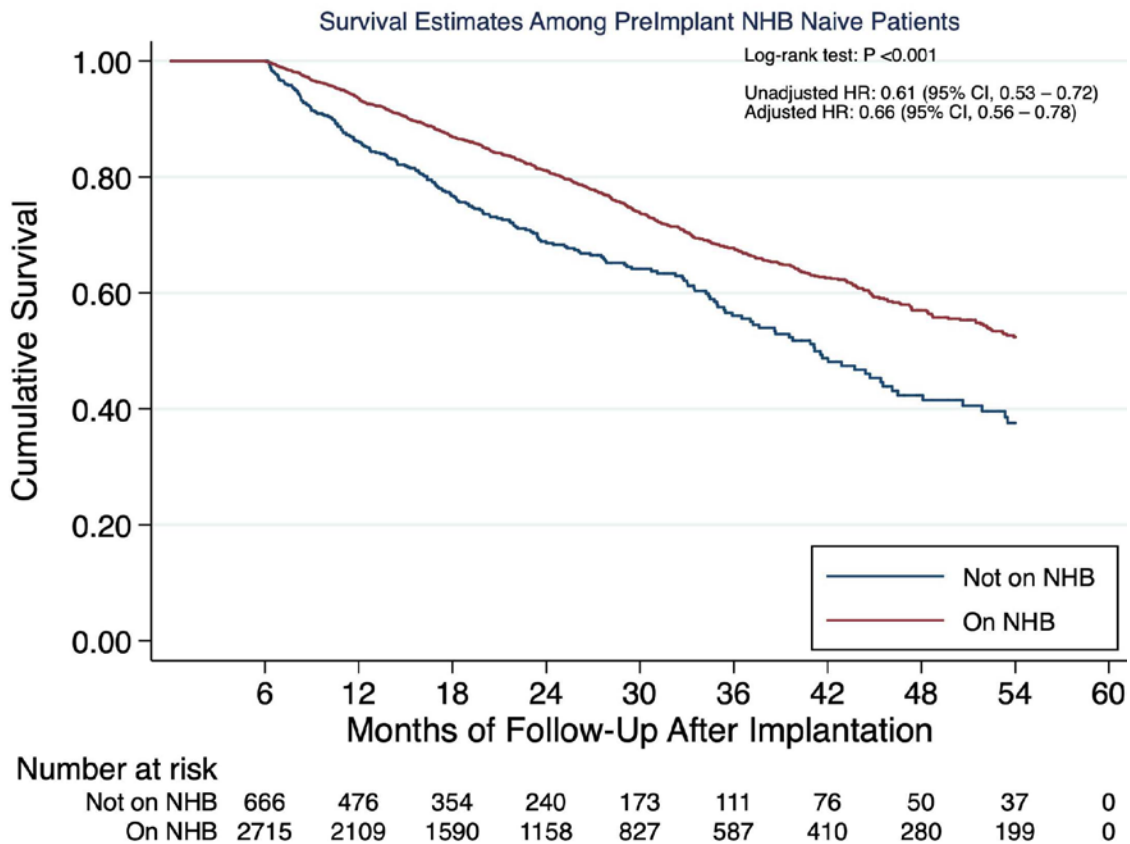

### eFigure 3. Competing Risk Analysis for Patients with either BTT or DT as device strategy.

Hazard ratios (HR) were adjusted for early hazard risks from the INTERMACS 8<sup>th</sup> annual report (age, sex, body mass index, ICD, INTERMACS profile 1 or 2, albumin, dialysis, blood urea nitrogen, total bilirubin, history of cardiac surgery, concomitant cardiac surgery, and too sick to complete EQ5D). NHB = neurohormonal blockage; Triple = therapy with all three NHB drug classes.

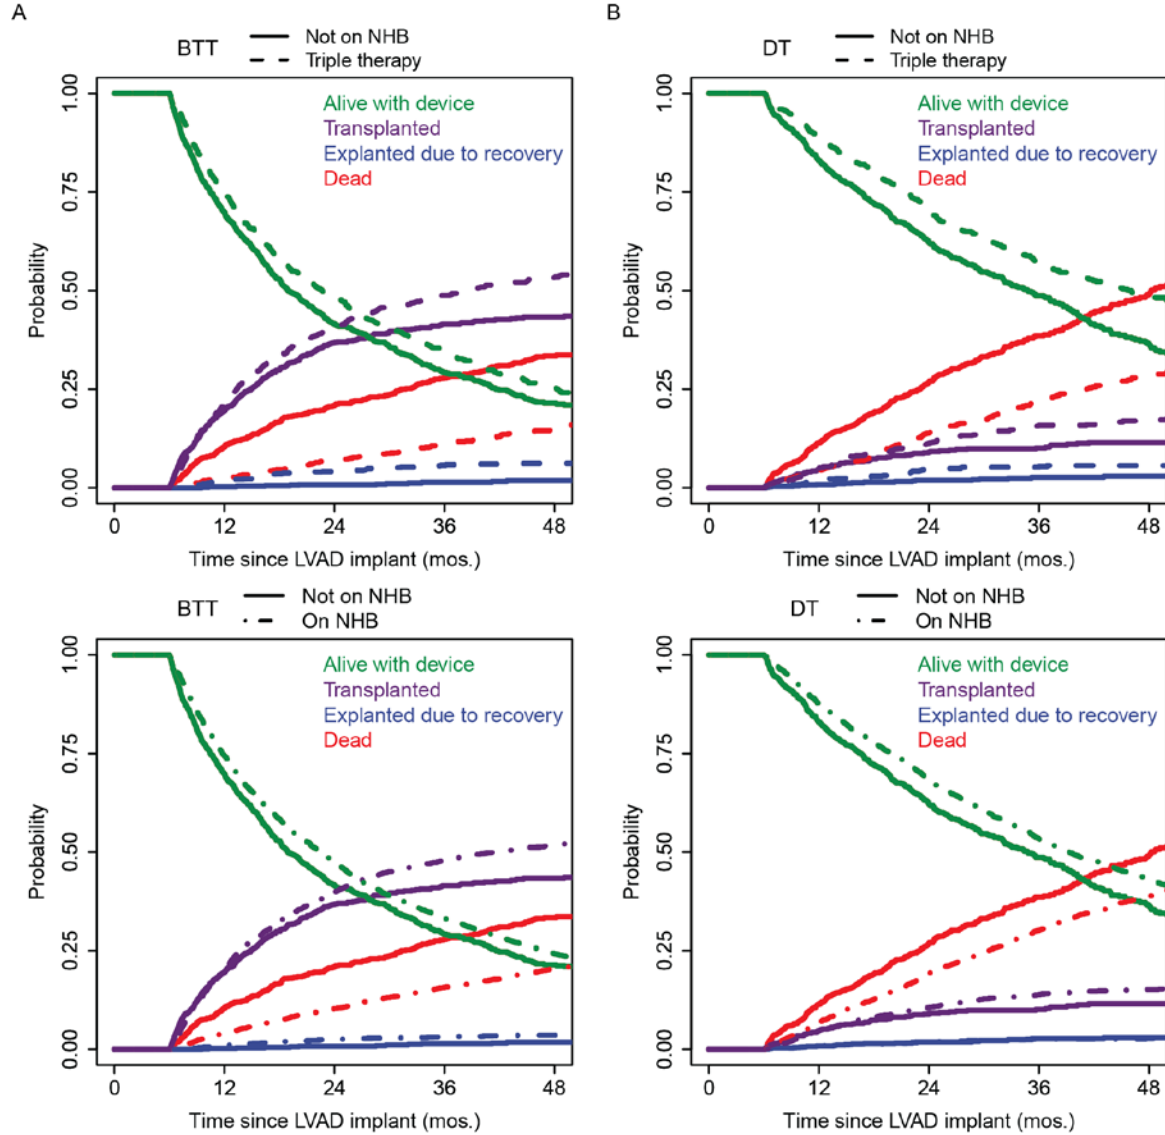

C

| @ Time=48 mos. |                | Dead             | Explanted     | Transplanted     | Alive            |
|----------------|----------------|------------------|---------------|------------------|------------------|
| BTT            | Not on NHB     | 33.4 (30.0-37.2) | 1.8 (1.0-3.2) | 43.3 (39.9-47.1) | 21.4 (18.4-25.0) |
|                | On NHB         | 20.5 (19.3-21.7) | 3.6 (3.1-4.1) | 51.7 (50.3-53.1) | 24.3 (23.0-25.6) |
|                | Triple therapy | 15.1 (12.9-17.7) | 6.2 (4.8-7.9) | 53.3 (50.2-56.6) | 25.4 (22.6-28.6) |
| DT             | Not on NHB     | 48.9 (44.8-53.3) | 2.9 (1.9-4.6) | 11.5 (9.4-14.2)  | 36.6 (32.6-41.1) |
|                | On NHB         | 38.9 (37.2-40.6) | 2.7 (2.2-3.3) | 15.2 (14.1-16.4) | 43.2 (41.5-45.0) |
|                | Triple therapy | 28.2 (24.7-32.3) | 5.7 (4.2-7.7) | 17.3 (14.5-20.5) | 48.9 (44.8-53.3) |

W
